# Supplementary material for: Kinetically controlled formation of a novel nanoparticulate ZnS with mixed cubic and hexagonal stacking
Source: Royal Society of Chemistry journal article supplement (doi:10.1039/b512580d), 2005-11-25
Supplement: b512580d.pdf [file b512580d.pdf]

## **Kinetically controlled formation of a novel nanoparticulate ZnS with mixed cubic and hexagonal stacking**

Hengzhong Zhang , Bin Chen, Benjamin Gilbert, Jillian F. Banfield

**TEM image of a nano-ZnS sample**

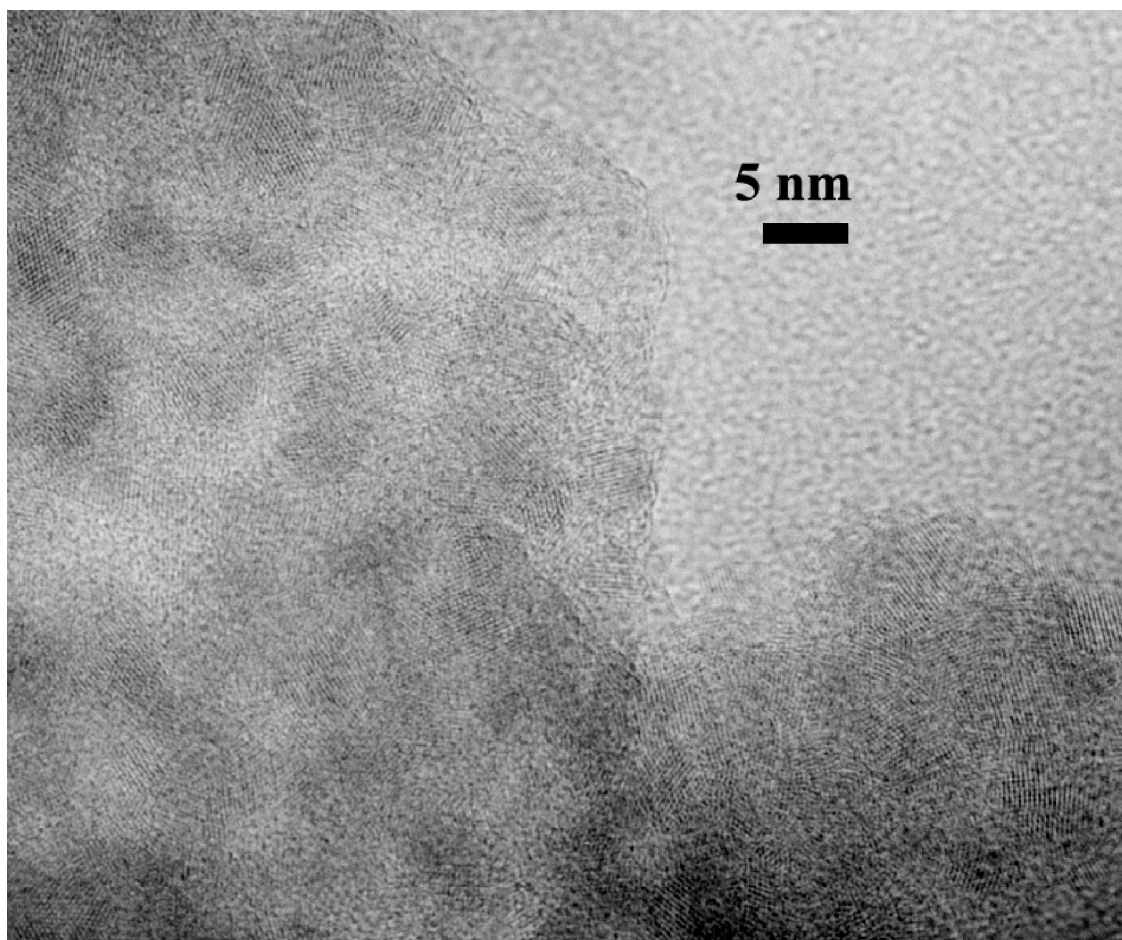

**Fig.S1.** TEM image of a nano-ZnS sample synthesized in a basic solution. Nanoparticles are highly aggregated and their particle sizes are around 5 nm.
